# Supplementary material
Source: PubMed Central journal article supplement (PMC11293491)
Supplement: NIHMS2009956-supplement-Supporting_Information.pdf [file NIHMS2009956-supplement-Supporting_Information.pdf]

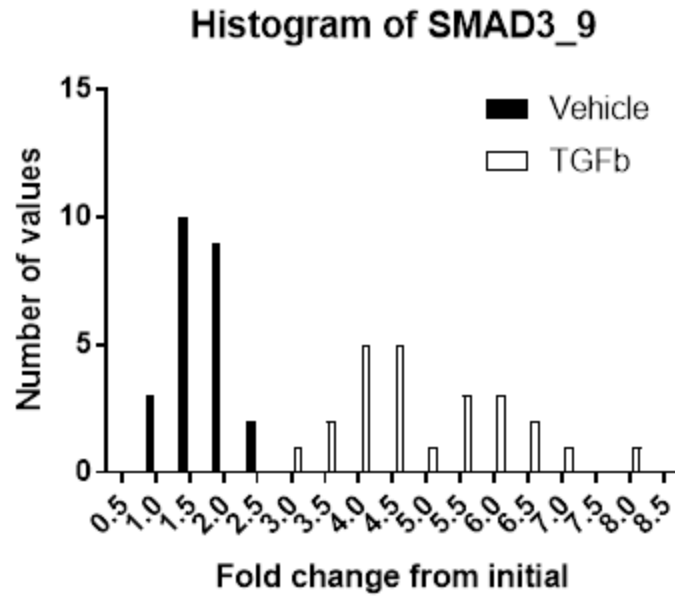

Figure S1: Histogram of raw fold change values from baseline for the SMAD3\_9 reporter 4 hours post stimulation with TGF $\beta$
